# Supplementary material for: Magnetic-assisted triboelectric nanogenerators as self-powered visualized omnidirectional tilt sensing system
Source: PubMed Central journal article supplement — Sci Rep. 2014 Apr 28;4:4811. doi: 10.1038/srep04811 (PMC4001096; doi:10.1038/srep04811), 2014-04-28
Supplement: srep04811-s1.pdf [file srep04811-s1.pdf]

# **Supplementary Information**

## **Magnetic-Assisted Triboelectric Nanogenerators as Self-Powered Visualized Omnidirectional Tilt Sensing System**

Mengdi Han, Xiao-Sheng, Zhang, Xuming Sun, Bo Meng, Wen Liu, Haixia Zhang\*

National Key Lab of Nano/Micro Fabrication Technology, Institute of  
Microelectronics, Peking University, Beijing, China, 100871

\*e-mail: zhang-alice@pku.edu.cn

### 1. Relationship between $TA_1$ , $TA_2$ and $\theta$ , $\varphi$

$TA_1$  is the tilt angle of the first TENG.

$TA_2$  is the tilt angle of the second TENG.

$\theta$  is the rotation angle around X-axis.

$\varphi$  is the rotation angle around Y-axis.

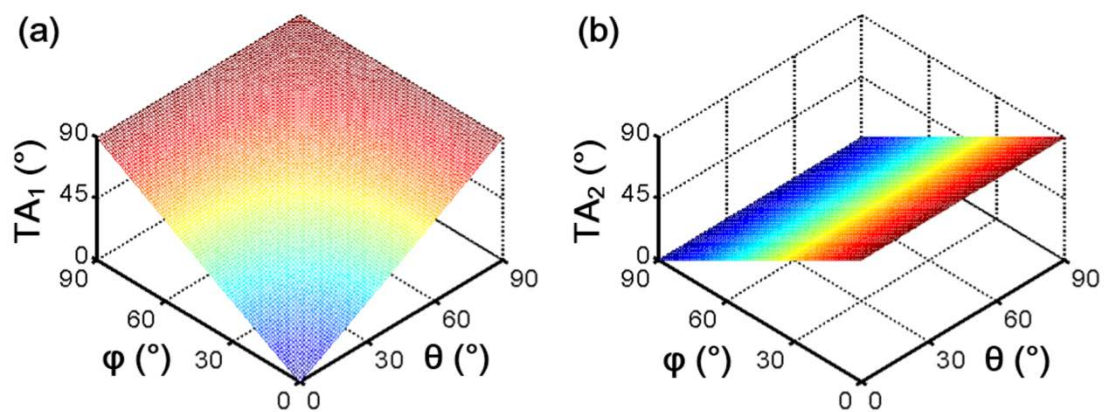

**Figure S1.** (a) Relationship between  $TA_1$  and  $\theta$ ,  $\varphi$ . (b) Relationship between  $TA_2$  and  $\theta$ ,  $\varphi$ .

## 2. Output voltage of the two TENGs as a self-powered omnidirectional tilt sensor

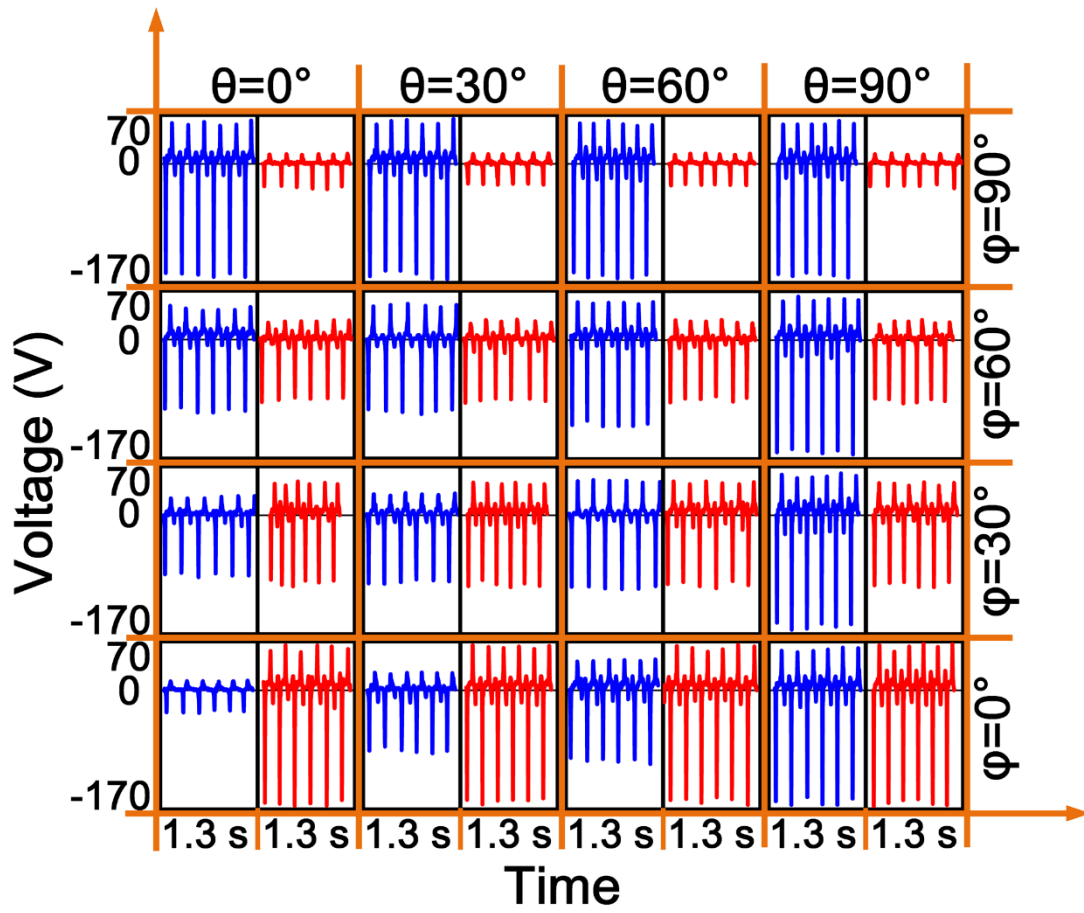

**Figure S2.** Detailed output voltage of the two TENGs at different tilt angles, with both  $\theta$  and  $\phi$  vary from  $0^\circ$  to  $90^\circ$ .

### 3. Supplement experimental characterization of the magnetic-assisted TENG

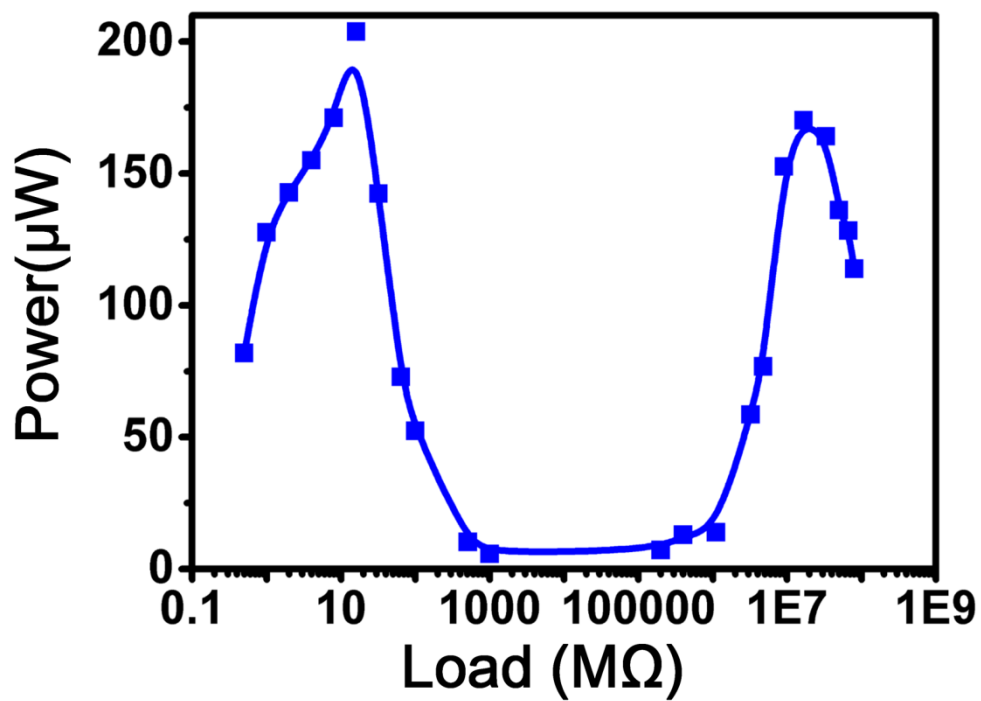

**Figure S3.** Total output power of the device under different load resistances.

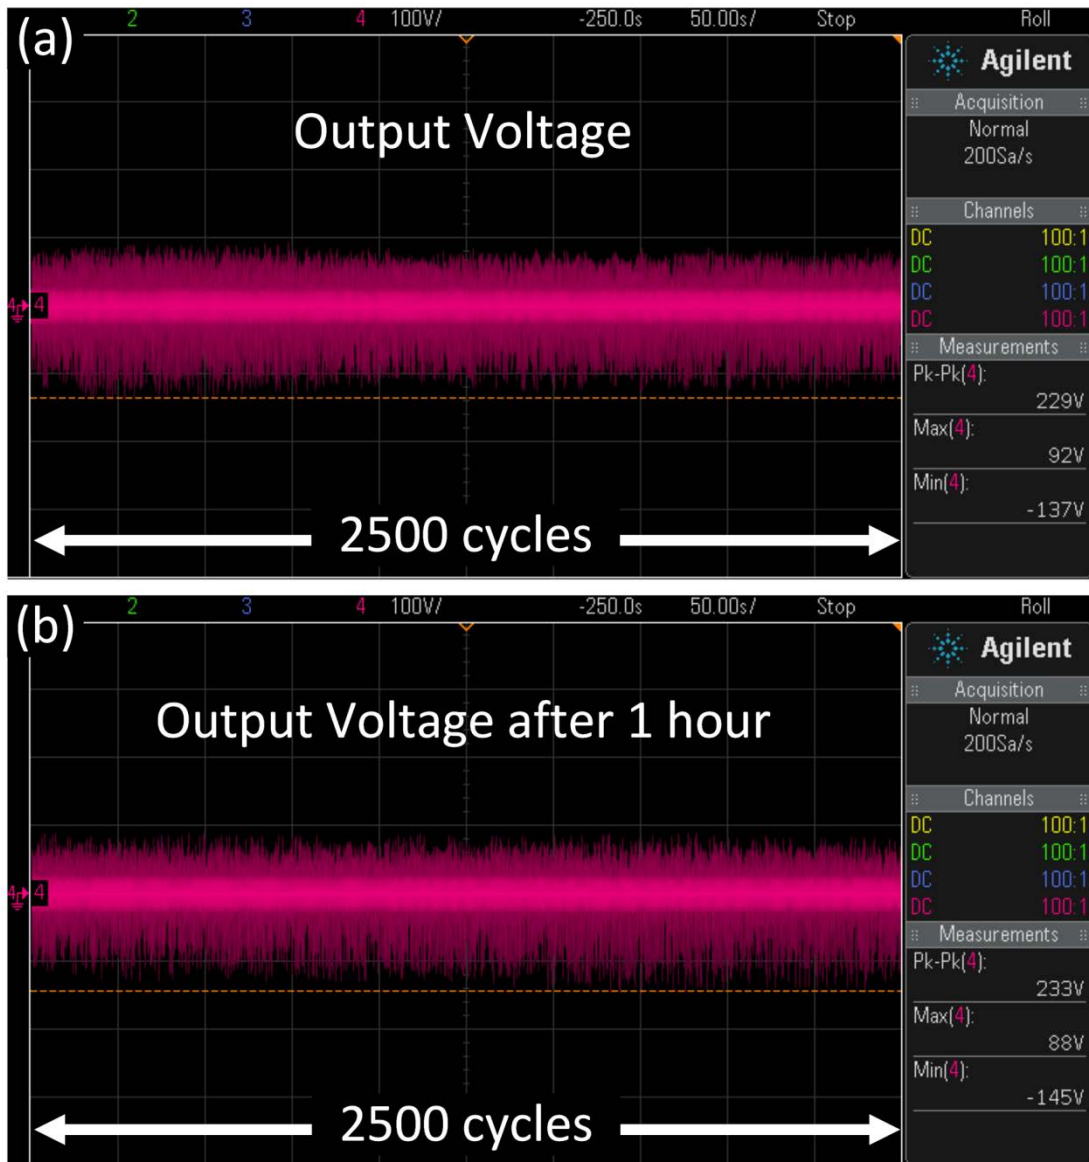

**Figure S4.** Stability measurement of the TENG. (a) Output voltage of the TENG at a 5 Hz external force. (b) Output voltage of the TENG after 1 hour.

**4. Fabrication process of the polyimide wrapped copper electrode**

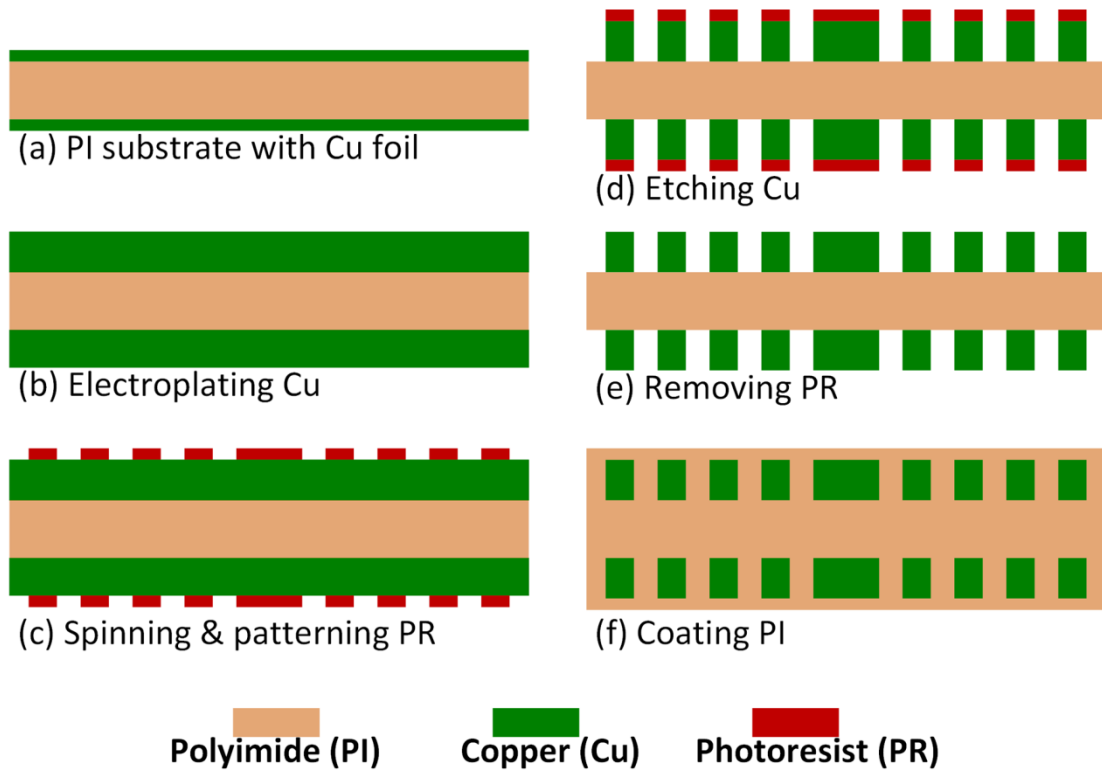

**Figure S5.** Cross-section view of the fabrication process.

## 5. Simulink model of the magnetic-assisted TENG and self-powered tilt sensor

**Table S1.** Parameters used in the Simulink model.

| Parameter                    | Value                   |
|------------------------------|-------------------------|
| Magnetization of the magnets | 890000 A/m              |
| Vacuum permeability          | $4\pi \times 10^{-7}$ T |
| Height of the two magnets    | 0.5 mm                  |
| Radius of the two magnets    | 5.0 mm                  |
| Top mass                     | 400 g                   |
| Acceleration of gravity      | $9.8 \text{ m/s}^2$     |
| Friction coefficient         | 0.15                    |
| Initial gap distance         | 3 mm                    |

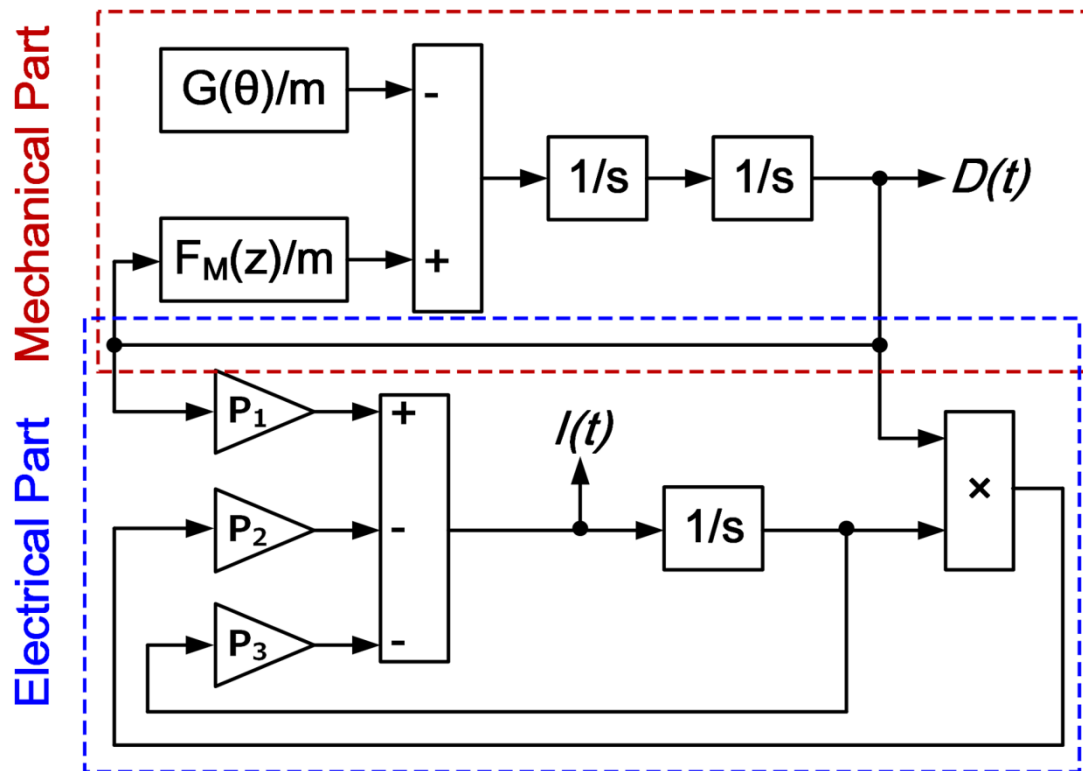

**Figure S6.** Simulink model of the TENG as a self-powered tilt sensor.

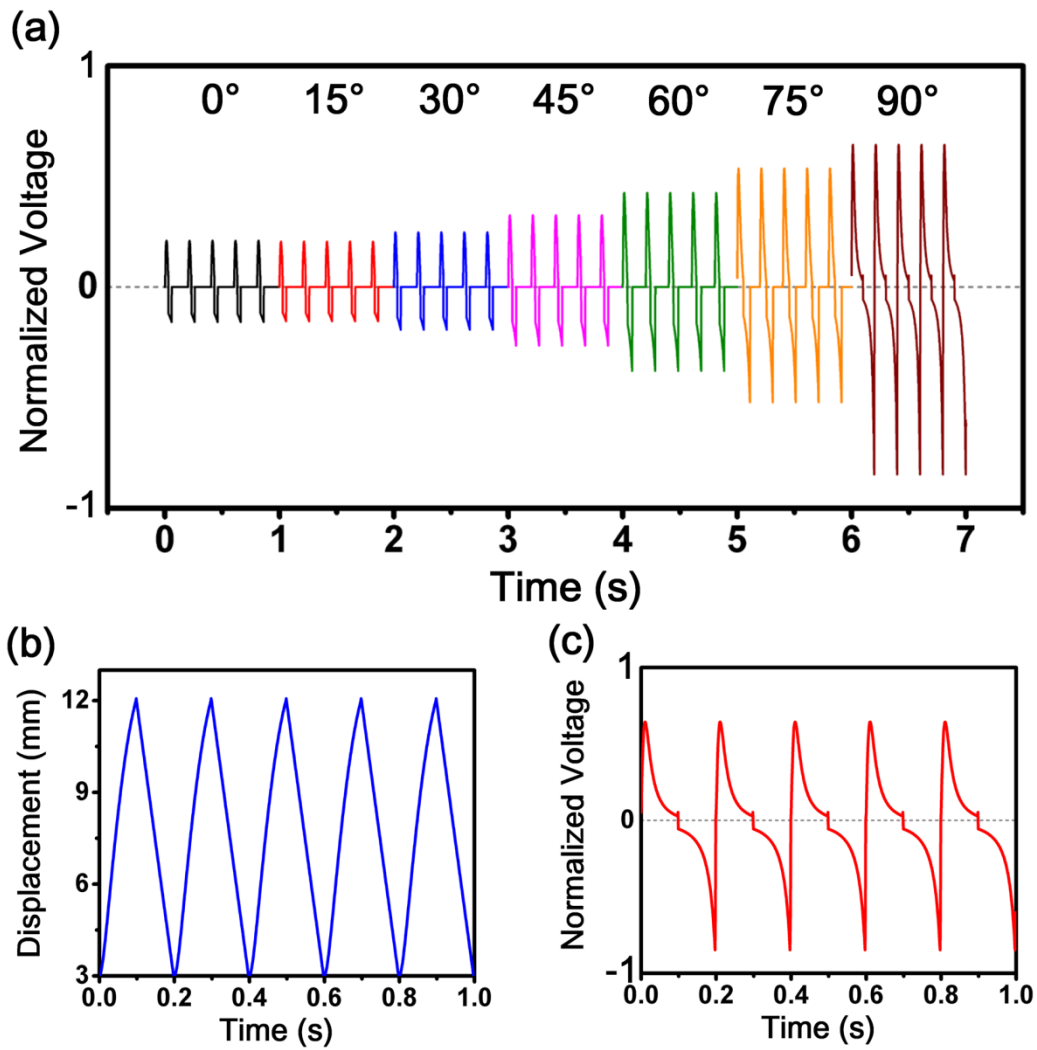

**Figure S7.** Theoretical output by the Simulink model. (a) Calculated output voltage at different tilt angles. (b) Time domain displacement at the tilt angle of 90°. (c) Time domain normalized voltage at the tilt angle of 90°.
